# Supplementary material for: A systematic review of ecological attributes that confer resilience to climate change in environmental restoration
Source: PLoS One. 2017 Mar 16;12(3):e0173812. doi: 10.1371/journal.pone.0173812 (PMC5354378; doi:10.1371/journal.pone.0173812)
Supplement: S1 Table — (XLSX) [file pone.0173812.s002.xlsx]

## Sheet: DST_color
	S1 Table: Decision Support Tool.
		Resilience Attributes	Restoration Focus (species, habitat, system)	Scale of Application (individual, population, site, ecosystem)
	Individual Attribues	Individual growth rate	species	individual
		Individual size	species	individual
		Life span	species	individual
		Individual characteristics that favor flexibility or adaptability *	species	individual
		Reproductive strategy	species	individual
		Adaptation to disturbance *	species	individual
		Presence of propagules	species, habitat	site
		Dispersal potential *	species, habitat	individual
		Efficient water capture and use	species	individual, site
	Population Attributes	Genetic diversity *	species	population
		Population size *	species	population
		Population density *	species, habitat	population
		Population growth rate	species	population
		Population age structure	species	population
		Connectivity between populations*	species	population, ecosystem
	Community Attributes	Community structure	habitat, system	site
		Species assemblage *	habitat, system	site
		Species (alpha) diversity *	habitat	site
		Functional diversity *	habitat, system	site, ecosystem
		Response diversity	habitat, system	site, ecosystem
		Functional redundancy *	habitat, system	site, ecosystem
		Connectivity among communities	habitat, system	ecosystem
	Ecosystem Attributes	Habitat area	species, habitat, system	site, ecosystem
		Habitat structure	species, habitat, system	site
		Habitat condition *	species, habitat, system	site, ecosystem
		Temporal variability in habitats *	system	ecosystem
		Spatial variability in habitats *	species, habitat, system	ecosystem
		Refugia or support areas *	species, habitat	site, ecosystem
		Connectivity between different habitats *	species, system	ecosystem
	Process Attributes	Connectivity to refugia areas	species, system	ecosystem
		Energy flows *	system	site, ecosystem
		Natural release from competition or predation	species	population
		Sedimentation	species, habitat, system	site, ecosystem
		Soil and air carbon balance	habitat	site
		Hyporheic flows	species, habitat, system	site, ecosystem
		Flow regime	species, system	site, ecosystem
		Groundwater contributions	species, habitat, system	site, ecosystem
		Structural legacies *	species, habitat	site
		Water infiltration	habitat	site
		Feedbacks between physical and biological processes	system	site, population, ecosystem
		Recovery (time) after disturbance	species, habitat	species, site
		Natural disturbance history *	species, habitat, system	site, ecosystem
		Random environmental variability	species, habitat, system	site, ecosystem
		Disturbance duration and intensity	species, habitat, system	site
		Degree of exposure to human pressures	species, habitat, system	site, ecosystem
